# Supplementary material for: Dexmedetomidine attenuates airway inflammation and oxidative stress in asthma via the Nrf2 signaling pathway
Source: PubMed Central journal article supplement — Mol Med Rep. 2022 Nov 2;27(1):2. doi: 10.3892/mmr.2022.12889 (PMC9673067; doi:10.3892/mmr.2022.12889), 2022-11-02

Figure S1. Wright-Giemsa-stained BALF smear. BALF smears from each group were stained with Wright-Giemsa. Magnification, x200; scale bar, 100  $\mu$ m. BALF, bronchoalveolar lavage fluid; DEX, dexmedetomidine; OVA, ovalbumin.

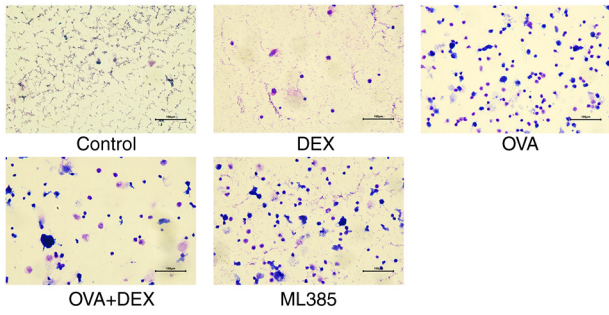

Figure S2. ML385 administration exerts no effect on airway hyperresponsiveness. Airway resistance of mice in response to different concentrations of nebulized methacholine (0, 6, 12, 24 and 48 mg/ml). The quantitative data are presented as mean  $\pm$  standard deviation (n=3). \*\*\*P<0.001; #P<0.05. DEX, dexmedetomidine; OVA, ovalbumin; Rrs, respiratory resistance.

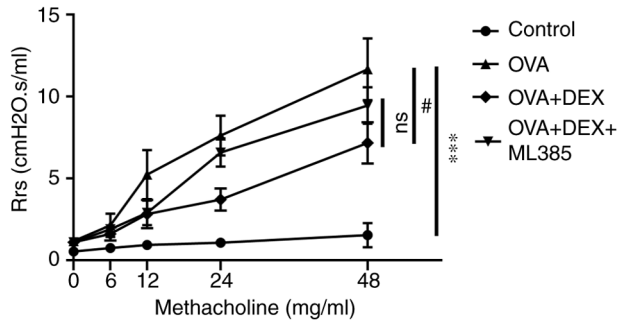

Supplement: Supplementary_Data.pdf [file Supplementary_Data.pdf]
